CORRECTION

# Correction: Face masks to prevent transmission of respiratory infections: Systematic review and meta-analysis of randomized controlled trials on face mask use

The *PLOS One* Editors

This article [1] was previously corrected in [2] to address concerns including incorrect inclusion of one study [3] in the odds ratio meta-analysis; however, the Correction [2] did not include a reanalysis of the meta-regression excluding Abdin et al. [3]. Upon follow-up, the first and last authors provided a revised meta-regression (S8 Correction). Based on the recommendation of a statistical reviewer, who reviewed the reanalysis, the authors note that the meta-regression was originally run as an additional sensitivity analysis and can be interpreted as exploratory on its own, given the limited number of observations. They further stated that the conclusions of [1] remain unchanged.

## Supporting information

**S8 Correction. Meta-regression analysis.** Re-analysis of the meta-regression without Abdin et al.  
(PDF)

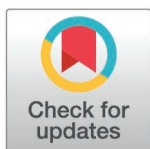

## References

1. Ollila HM, Partinen M, Koskela J, Borghi J, Savolainen R, Rotkirch A, et al. Face masks to prevent transmission of respiratory infections: systematic review and meta-analysis of randomized controlled trials on face mask use. *PLoS One*. 2022;17(12):e0271517. <https://doi.org/10.1371/journal.pone.0271517> PMID: 36454947
2. Ollila HM, Partinen M, Koskela J, Borghi J, Savolainen R, Rotkirch A, et al. Correction: Face masks to prevent transmission of respiratory infections: systematic review and meta-analysis of randomized controlled trials on face mask use. *PLoS One*. 2025;20(3):e0320226. <https://doi.org/10.1371/journal.pone.0320226> PMID: 40036174
3. Abdin EZ, Choudhry A, Al-Naji D. Effect of use of Face mask on Hajj related Acute Respiratory Infection among Hajjis from Riyadh—A Health Promotion Intervention study. *Saudi Epidemiol Bull*. 2005;12(4):27–8.

## OPEN ACCESS

**Citation:** The *PLOS One* Editors (2025) Correction: Face masks to prevent transmission of respiratory infections: Systematic review and meta-analysis of randomized controlled trials on face mask use. *PLoS One* 20(5): e0325466. <https://doi.org/10.1371/journal.pone.0325466>

**Published:** May 30, 2025

**Copyright:** © 2025 The *PLOS One* Editors. This is an open access article distributed under the terms of the [Creative Commons Attribution License](https://creativecommons.org/licenses/by/4.0/), which permits unrestricted use, distribution, and reproduction in any medium, provided the original author and source are credited.
